# Supplementary material for: Identification of Human IKK-2 Inhibitors of Natural Origin (Part I): Modeling of the IKK-2 Kinase Domain, Virtual Screening and Activity Assays
Source: PubMed Central journal article supplement (PMC3044726; doi:10.1371/journal.pone.0016903), 2011-02-24
Supplement: pone.0016903.s003.pdf [file pone.0016903.s003.pdf]

**Table S3.** Scaffold-hopping candidates for hIKK-2 inhibition predicted by our study.

| Cluster 1 hits |       |       |       | Cluster 2 hits      |              |              |              | Cluster 3 hits      |              |              |              |              |       |       |       |
|----------------|-------|-------|-------|---------------------|--------------|--------------|--------------|---------------------|--------------|--------------|--------------|--------------|-------|-------|-------|
|                | PB    | Shape | Combo |                     | PB           | Shape        | Combo        |                     | PB           | Shape        | Combo        |              |       |       |       |
| ZINC12410246   | 0.699 | 0.528 | 1.227 | ZINC08298038        | 0.597        | 0.349        | 0.946        | ZINC00485744        | 0.723        | 0.480        | 1.203        | ZINC00071662 | 0.536 | 0.665 | 1.201 |
| ZINC04222236   | 0.727 | 0.498 | 1.224 | ZINC08298000        | 0.633        | 0.308        | 0.941        | ZINC03838566        | 0.704        | 0.475        | 1.179        | ZINC00138773 | 0.742 | 0.438 | 1.180 |
| ZINC08299593   | 0.723 | 0.462 | 1.185 | ZINC04260050        | 0.609        | 0.325        | 0.934        | ZINC00346993        | 0.585        | 0.586        | 1.170        | ZINC00525792 | 0.727 | 0.435 | 1.162 |
| ZINC08300807   | 0.606 | 0.560 | 1.166 | ZINC03851724        | 0.520        | 0.414        | 0.933        | ZINC00094845        | 0.580        | 0.587        | 1.167        | ZINC03842171 | 0.424 | 0.474 | 0.898 |
| ZINC08300706   | 0.697 | 0.460 | 1.157 | ZINC05415683        | 0.585        | 0.345        | 0.929        | ZINC00485534        | 0.651        | 0.508        | 1.159        | ZINC00126518 | 0.627 | 0.444 | 1.071 |
| ZINC05730981   | 0.682 | 0.451 | 1.134 | ZINC08635779        | 0.579        | 0.349        | 0.928        | ZINC13424993        | 0.544        | 0.613        | 1.157        | ZINC00040813 | 0.228 | 0.662 | 0.890 |
| ZINC08299517   | 0.645 | 0.489 | 1.134 | ZINC08299591        | 0.516        | 0.412        | 0.928        | ZINC11616540        | 0.709        | 0.433        | 1.141        | ZINC05224529 | 0.511 | 0.376 | 0.888 |
| ZINC04235841   | 0.626 | 0.498 | 1.124 | ZINC08299896        | 0.497        | 0.429        | 0.926        | ZINC00227258        | 0.660        | 0.477        | 1.137        | ZINC00517451 | 0.381 | 0.504 | 0.885 |
| ZINC05433728   | 0.638 | 0.467 | 1.105 | ZINC08298463        | 0.580        | 0.343        | 0.924        | ZINC00485860        | 0.623        | 0.510        | 1.132        | ZINC01317724 | 0.224 | 0.660 | 0.884 |
| ZINC08298452   | 0.716 | 0.382 | 1.098 | ZINC00058208        | 0.261        | 0.661        | 0.923        | ZINC08762138        | 0.497        | 0.623        | 1.120        | ZINC02604995 | 0.600 | 0.284 | 0.883 |
| ZINC08635299   | 0.677 | 0.414 | 1.091 | ZINC08299131        | 0.538        | 0.378        | 0.917        | ZINC00036355        | 0.626        | 0.487        | 1.113        | ZINC03786448 | 0.250 | 0.633 | 0.883 |
| ZINC08299522   | 0.632 | 0.458 | 1.091 | ZINC08297955        | 0.444        | 0.472        | 0.917        | ZINC12657772        | 0.505        | 0.607        | 1.112        | ZINC05224397 | 0.553 | 0.329 | 0.881 |
| ZINC12604815   | 0.542 | 0.547 | 1.089 | ZINC08300143        | 0.629        | 0.287        | 0.916        | ZINC02124459        | 0.562        | 0.541        | 1.104        | ZINC00039884 | 0.342 | 0.536 | 0.878 |
| ZINC08623382   | 0.618 | 0.457 | 1.075 | ZINC03841142        | 0.575        | 0.341        | 0.915        | ZINC04081954        | 0.524        | 0.564        | 1.088        | ZINC12604997 | 0.615 | 0.261 | 0.876 |
| ZINC08298456   | 0.627 | 0.441 | 1.068 | ZINC00195221        | 0.491        | 0.424        | 0.915        | ZINC08738350        | 0.566        | 0.521        | 1.087        | ZINC11616541 | 0.598 | 0.276 | 0.875 |
| ZINC05433715   | 0.601 | 0.466 | 1.068 | ZINC02023740        | 0.175        | 0.739        | 0.914        | ZINC08762259        | 0.510        | 0.573        | 1.082        | ZINC02090323 | 0.423 | 0.452 | 0.875 |
| ZINC03841282   | 0.686 | 0.380 | 1.066 | ZINC01204686        | 0.644        | 0.267        | 0.911        | ZINC00388584        | 0.665        | 0.415        | 1.080        | ZINC03852423 | 0.444 | 0.430 | 0.874 |
| ZINC04028468   | 0.633 | 0.429 | 1.062 | ZINC08298449        | 0.588        | 0.321        | 0.910        | ZINC00130101        | 0.614        | 0.464        | 1.078        | ZINC02027203 | 0.300 | 0.573 | 0.874 |
| ZINC08296915   | 0.695 | 0.361 | 1.056 | ZINC04082733        | 0.528        | 0.381        | 0.909        | ZINC00180655        | 0.603        | 0.471        | 1.074        | ZINC03898167 | 0.461 | 0.410 | 0.871 |
| ZINC04222674   | 0.515 | 0.540 | 1.055 | <b>ZINC01669260</b> | <b>0.512</b> | <b>0.397</b> | <b>0.909</b> | ZINC01646905        | 0.584        | 0.490        | 1.074        | ZINC13424994 | 0.406 | 0.463 | 0.868 |
| ZINC08299611   | 0.629 | 0.425 | 1.054 | ZINC04222254        | 0.483        | 0.426        | 0.909        | ZINC01102508        | 0.606        | 0.459        | 1.065        | ZINC13300696 | 0.492 | 0.368 | 0.868 |
| ZINC04235840   | 0.629 | 0.420 | 1.049 | ZINC08299700        | 0.595        | 0.313        | 0.907        | ZINC04027790        | 0.524        | 0.536        | 1.060        | ZINC01081585 | 0.400 | 0.460 | 0.860 |
| ZINC08300121   | 0.641 | 0.407 | 1.048 | ZINC03841141        | 0.595        | 0.307        | 0.902        | ZINC12318138        | 0.590        | 0.462        | 1.052        | ZINC13306051 | 0.488 | 0.371 | 0.859 |
| ZINC03841201   | 0.608 | 0.439 | 1.048 | ZINC08298553        | 0.563        | 0.337        | 0.901        | ZINC01854651        | 0.572        | 0.475        | 1.048        | ZINC03984208 | 0.382 | 0.476 | 0.858 |
| ZINC08297952   | 0.648 | 0.394 | 1.043 | ZINC08296886        | 0.327        | 0.573        | 0.900        | ZINC00044054        | 0.541        | 0.505        | 1.046        | ZINC01665127 | 0.337 | 0.519 | 0.856 |
| ZINC05433681   | 0.637 | 0.403 | 1.040 | ZINC08298004        | 0.441        | 0.458        | 0.899        | ZINC00517161        | 0.582        | 0.461        | 1.044        | ZINC00369448 | 0.445 | 0.410 | 0.855 |
| ZINC04235837   | 0.603 | 0.424 | 1.027 | ZINC05397696        | 0.467        | 0.432        | 0.898        | ZINC01321570        | 0.563        | 0.478        | 1.041        | ZINC05224220 | 0.404 | 0.449 | 0.853 |
| ZINC08299759   | 0.530 | 0.490 | 1.020 | ZINC12604970        | 0.593        | 0.303        | 0.896        | ZINC04104779        | 0.547        | 0.489        | 1.036        | ZINC01556769 | 0.245 | 0.606 | 0.851 |
| ZINC04260104   | 0.648 | 0.370 | 1.018 | ZINC00485710        | 0.468        | 0.427        | 0.896        | ZINC01950801        | 0.631        | 0.401        | 1.031        |              |       |       |       |
| ZINC08296937   | 0.696 | 0.319 | 1.015 | ZINC04235971        | 0.415        | 0.481        | 0.896        | ZINC00485558        | 0.717        | 0.313        | 1.029        |              |       |       |       |
| ZINC08298035   | 0.662 | 0.346 | 1.009 | ZINC04236053        | 0.519        | 0.373        | 0.892        | ZINC13425030        | 0.590        | 0.436        | 1.027        |              |       |       |       |
| ZINC00460033   | 0.504 | 0.500 | 1.004 | ZINC08296889        | 0.415        | 0.476        | 0.891        | ZINC12318136        | 0.585        | 0.442        | 1.027        |              |       |       |       |
| ZINC04235839   | 0.618 | 0.379 | 0.997 | <b>ZINC00058225</b> | <b>0.231</b> | <b>0.660</b> | <b>0.891</b> | ZINC12656099        | 0.531        | 0.493        | 1.024        |              |       |       |       |
| ZINC04222682   | 0.591 | 0.403 | 0.993 | ZINC05434223        | 0.476        | 0.412        | 0.888        | ZINC02124460        | 0.583        | 0.438        | 1.021        |              |       |       |       |
| ZINC08254138   | 0.661 | 0.331 | 0.992 | ZINC08254330        | 0.641        | 0.243        | 0.883        | ZINC04032263        | 0.531        | 0.488        | 1.019        |              |       |       |       |
| ZINC00035451   | 0.679 | 0.313 | 0.991 | ZINC08299765        | 0.364        | 0.518        | 0.882        | ZINC00485559        | 0.505        | 0.504        | 1.009        |              |       |       |       |
| ZINC05396170   | 0.589 | 0.402 | 0.991 | ZINC08298536        | 0.519        | 0.362        | 0.881        | ZINC13425093        | 0.670        | 0.336        | 1.006        |              |       |       |       |
| ZINC08254141   | 0.678 | 0.312 | 0.990 | ZINC08299629        | 0.543        | 0.335        | 0.878        | ZINC01842501        | 0.545        | 0.457        | 1.002        |              |       |       |       |
| ZINC03838691   | 0.598 | 0.390 | 0.989 | ZINC05433729        | 0.385        | 0.492        | 0.877        | ZINC03978029        | 0.527        | 0.473        | 0.999        |              |       |       |       |
| ZINC00485569   | 0.604 | 0.381 | 0.986 | ZINC05279694        | 0.487        | 0.384        | 0.871        | ZINC02372275        | 0.631        | 0.366        | 0.996        |              |       |       |       |
| ZINC08299569   | 0.589 | 0.396 | 0.985 | ZINC04235956        | 0.581        | 0.288        | 0.869        | ZINC13306038        | 0.456        | 0.540        | 0.996        |              |       |       |       |
| ZINC00058275   | 0.329 | 0.657 | 0.985 | ZINC08296677        | 0.487        | 0.382        | 0.869        | ZINC12655829        | 0.518        | 0.476        | 0.994        |              |       |       |       |
| ZINC08296946   | 0.689 | 0.295 | 0.984 | ZINC04236052        | 0.495        | 0.373        | 0.868        | ZINC05224095        | 0.446        | 0.543        | 0.989        |              |       |       |       |
| ZINC04236050   | 0.505 | 0.479 | 0.984 | ZINC05433716        | 0.381        | 0.487        | 0.868        | ZINC13425031        | 0.593        | 0.392        | 0.985        |              |       |       |       |
| ZINC04222681   | 0.591 | 0.391 | 0.982 | ZINC04236049        | 0.501        | 0.365        | 0.866        | ZINC12658812        | 0.516        | 0.462        | 0.979        |              |       |       |       |
| ZINC00035452   | 0.592 | 0.388 | 0.979 | ZINC08300122        | 0.496        | 0.370        | 0.866        | <b>ZINC03683886</b> | <b>0.559</b> | <b>0.419</b> | <b>0.977</b> |              |       |       |       |
| ZINC08300479   | 0.535 | 0.443 | 0.978 | ZINC01601221        | 0.204        | 0.662        | 0.866        | ZINC00517162        | 0.533        | 0.445        | 0.977        |              |       |       |       |
| ZINC08299635   | 0.641 | 0.336 | 0.977 | ZINC08298097        | 0.638        | 0.227        | 0.865        | ZINC01321569        | 0.603        | 0.362        | 0.965        |              |       |       |       |
| ZINC08300733   | 0.613 | 0.363 | 0.976 | ZINC04235961        | 0.592        | 0.272        | 0.864        | ZINC08552275        | 0.566        | 0.398        | 0.964        |              |       |       |       |
| ZINC12604292   | 0.547 | 0.424 | 0.971 | ZINC08254273        | 0.509        | 0.352        | 0.861        | ZINC04027791        | 0.414        | 0.544        | 0.958        |              |       |       |       |
| ZINC03838674   | 0.578 | 0.390 | 0.968 | <b>ZINC16946275</b> | <b>0.504</b> | <b>0.357</b> | <b>0.861</b> | ZINC01679223        | 0.293        | 0.661        | 0.954        |              |       |       |       |
| ZINC08254375   | 0.562 | 0.405 | 0.966 | ZINC04236055        | 0.517        | 0.343        | 0.860        | ZINC12657776        | 0.565        | 0.387        | 0.952        |              |       |       |       |
| ZINC08298030   | 0.668 | 0.296 | 0.963 | ZINC04236051        | 0.509        | 0.350        | 0.859        | ZINC12428234        | 0.655        | 0.291        | 0.946        |              |       |       |       |
| ZINC00485709   | 0.396 | 0.565 | 0.961 | ZINC04235957        | 0.582        | 0.274        | 0.856        | ZINC08762235        | 0.471        | 0.471        | 0.942        |              |       |       |       |
| ZINC05433719   | 0.494 | 0.462 | 0.957 | ZINC08298002        | 0.555        | 0.301        | 0.856        | ZINC03838563        | 0.569        | 0.369        | 0.939        |              |       |       |       |
| ZINC04260127   | 0.594 | 0.360 | 0.954 | ZINC12604752        | 0.439        | 0.416        | 0.855        | ZINC08299557        | 0.429        | 0.507        | 0.937        |              |       |       |       |
| ZINC08298652   | 0.570 | 0.382 | 0.953 | ZINC03841193        | 0.256        | 0.598        | 0.854        | ZINC12661595        | 0.522        | 0.414        | 0.936        |              |       |       |       |
| ZINC08254451   | 0.664 | 0.287 | 0.951 | ZINC04236054        | 0.503        | 0.350        | 0.853        | ZINC03898166        | 0.475        | 0.457        | 0.932        |              |       |       |       |
| ZINC04260095   | 0.624 | 0.327 | 0.951 | ZINC00048191        | 0.498        | 0.355        | 0.853        | ZINC12660883        | 0.664        | 0.263        | 0.928        |              |       |       |       |
| ZINC08298659   | 0.619 | 0.328 | 0.947 | ZINC08299638        | 0.616        | 0.235        | 0.851        | ZINC08740325        | 0.499        | 0.428        | 0.927        |              |       |       |       |

The ZINC codes for the 246 hit molecules predicted to inhibit hIKK-2 and belonging to clusters consisting exclusively of natural products. For each hit molecule, the best results of the shape and electrostatic-potential comparisons with 43 poses from 21 known hIKK-2 inhibitors (see Table S1) is shown. Thus, the Tanimoto values for the comparison between the electrostatic potentials of the molecules (using an outer dielectric of 80) are shown in the *PB* columns, whereas the values for the comparison between shapes are shown in the *Shape* columns. The sum of the PB and Shape values is reported in the *Combo* columns. Hits from each cluster are sorted according their decreasing combo value. All of these hit molecules are scaffold-hopping candidates for hIKK-2 inhibition because the Tanimoto similarities between their MOLPRINT 2D fingerprints and those from the hIKK-2 inhibitors in Tables S1 and S2 are quite low. ZINC00058225, ZINC01669260 and ZINC16946275 from Cluster 1, ZINC03683886 from Cluster 2, and ZINC03871389 from Cluster 3 were selected to experimentally test the success rate of our predictions using an *in vitro* assay (in bold in Table S3). The results of this experiment showed that three out of the five molecules (*i.e.*, ZINC01669260 from Cluster 1, ZINC03683886 from Cluster 2 and ZINC03871389 from Cluster 3) inhibited hIKK-2, with IC<sub>50</sub> values ranging from 183.8 to 3,325 μM.
